# Supplementary material for: Specific detection of soluble EphA2 fragments in blood as a new biomarker for pancreatic cancer
Source: PubMed Central journal article supplement (PMC5680914; doi:10.1038/cddis.2017.545), 2017-10-26
Supplement: cddis2017545x2.pdf [file cddis2017545x2.pdf]

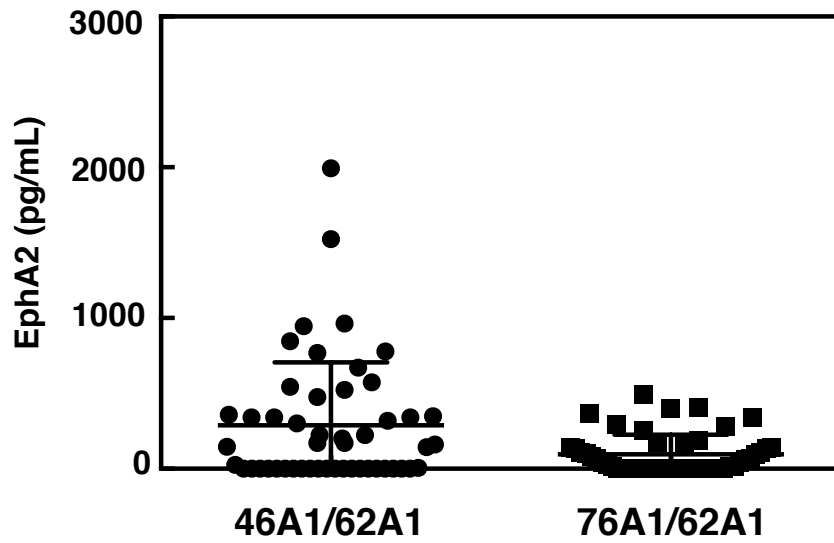

13

14 **Figure S2. Comparison of serum EphA2 levels in healthy donors.**

15 Sandwich enzyme-linked immunosorbent assay (ELISA) using monoclonal antibody (mAb)  
 16 46A1 as the capture antibody and mAb 61A1 for detection yielded some false positive reactions  
 17 due to detection of both intact and soluble EphA2 fragments (n = 26). In contrast, the sandwich  
 18 ELISA using mAb 76A1 for capture and mAb 62A1 for detection showed that the standard  
 19 deviation value for soluble EphA2 fragment in healthy donors was small and tightly gathered  
 20 around the mean value.
